# Supplementary material
Source: HighWire-hosted journal article supplement (https://erj.ersjournals.com/content/56/4/2002096)
Supplement: inline-supplementary-material-1 [file inline-supplementary-material-1.pdf]

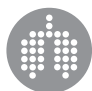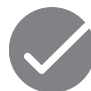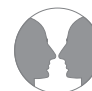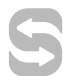

SHAREABLE PDF

# Low physical functioning and impaired performance of activities of daily life in COVID-19 patients who survived hospitalisation

Stefano Belli <sup>1</sup>, Bruno Balbi<sup>1</sup>, Ilaria Prince<sup>1</sup>, Davide Cattaneo <sup>1</sup>,  
Francesca Masocco<sup>1</sup>, Sergio Zaccaria<sup>1</sup>, Luca Bertalli<sup>1</sup>, Francesco Cattini<sup>1</sup>,  
Arianna Lomazzo<sup>1</sup>, Francesca Dal Negro<sup>1</sup>, Marica Giardini<sup>1</sup>, Frits M.E. Franssen  
<sup>2,3,4</sup>, Daisy J.A. Janssen <sup>2,5</sup> and Martijn A. Spruit <sup>2,3,4,6</sup>

**Affiliations:** <sup>1</sup>Pulmonary Rehabilitation of the Institute of Veruno, Istituti Clinici Scientifici Maugeri IRCCS, Novara, Italy. <sup>2</sup>Dept of Research and Development, CRO+, Horn, The Netherlands. <sup>3</sup>Dept of Respiratory Medicine, Maastricht University Medical Center (MUMC+), Maastricht, The Netherlands. <sup>4</sup>NUTRIM School of Nutrition and Translational Research in Metabolism, Maastricht, The Netherlands. <sup>5</sup>Dept of Health Services Research, Care and Public Health Research Institute, Faculty of Health Medicine and Life Sciences, Maastricht University, Maastricht, The Netherlands. <sup>6</sup>REVAL Rehabilitation Research Center, BIOMED Biomedical Research Institute, Faculty of Rehabilitation Sciences, Hasselt University, Diepenbeek, Belgium.

**Correspondence:** Stefano Belli, IRCCS Istituti Clinici Scientifici Maugeri SpA SB, Via Salvatore Maugeri 4, 27100 Pavia, Italy. E-mail: stefano.belli@icsmaugeri.it

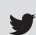

@ERSpublications

About half of post-COVID-19 patients had severe impairments in physical functioning and during activities of daily living at discharge home, providing a clear rationale to study the safety and efficacy of rehabilitative interventions in these patients <https://bit.ly/3hJvXJa>

**Cite this article as:** Belli S, Balbi B, Prince I, *et al.* Low physical functioning and impaired performance of activities of daily life in COVID-19 patients who survived hospitalisation. *Eur Respir J* 2020; 56: 2002096 [<https://doi.org/10.1183/13993003.02096-2020>].

This single-page version can be shared freely online.

## To the Editor:

Thousands of Italians with coronavirus disease 2019 (COVID-19) have been admitted to hospital. In the Piedmont Region, as of 12 May 2020, 12 272 patients survived hospital admission [1], and most of them were discharged home. As the influx of COVID-19 patients is exceeding the hospital bed capacity in Northern Italy, patients are discharged home after two negative reverse transcription (RT)-PCR tests for the severe acute respiratory syndrome coronavirus 2 (SARS-CoV-2), notwithstanding their physical status. Nevertheless, lower-limb muscle deconditioning and an impaired performance of activities of daily living (ADLs) are likely to occur. Indeed, COVID-19 patients suffer from multiple symptoms during hospitalisation, and the acute care takes place in strict isolation, which will reduce a patient's mobility to zero [2].
